# Supplementary material
Source: PubMed Central journal article supplement (PMC3343336)

## Supplementary Information

### Supplementary Materials and Methods

**Cell culture.** Wild type and NPC1-null (CT43) Chinese hamster ovary (CHO) fibroblasts were maintained in DMEM-Ham's F-12 medium (50-50 mix) supplemented with 10% FCS, L-glutamine, and penicillin–streptomycin. Vero African grivet monkey kidney cells and 293T human embryonic kidney cells were maintained in DMEM supplemented with 10% FCS, L-glutamine, and penicillin–streptomycin. VH-2 viper heart cells (ATCC) were cultured in MEM supplemented with 10% FCS and penicillin–streptomycin at 29°C. All mammalian cell lines were maintained in a humidified 5% CO<sub>2</sub> incubator.

**NPC1 and NPC1L1 constructs.** Human NPC1 and NPC1L1 cDNAs were ligated in-frame to a triple flag sequence, and the resulting genes encoding C-terminally FLAG-tagged NPC1 and NPC1L1 proteins were subcloned into the *Bam*HI and *Sal*I restriction sites of the pBABE-puro retroviral vector (Morgenstern and Land, 1990). Constructs encoding flag-tagged NPC1 'loop-minus' mutants in pBABE-puro [ $\Delta$ A, lacking NPC1 amino acid residues 24-252);  $\Delta$ C, lacking residues 381-611);  $\Delta$ I, (lacking residues 865-1088)] were generated by replacing the indicated sequence with a *Bgl*II restriction site. To engineer the individual loop domain constructs, a cassette vector encoding the following sequence elements was first generated and cloned into the *Bam*HI and *Sal*I sites of pBABE-puro: NPC1 signal peptide (encoding NPC1 amino acid residues 1-24), *Mlu*I restriction site, the first NPC1 transmembrane domain (residues 267-295), NPC1 C-tail (residues 1252-1278), gly-gly-gly-ser linker, and triple flag tag. Each loop domain (A, residues 25-266; C, residues 373-620; I, residues 854-1098) was cloned into the *Mlu*I site of this cassette vector. Vectors expressing domain C-flag and domain C-flag<sup>tailless</sup> differ in only one respect: the latter lacks the NPC1 C-tail sequence. All constructs were verified by automated DNA sequencing.

**VH-2 and CT43 cell populations stably expressing NPC1 proteins.** For transduction of VH-2 cells, the full-length human NPC1 cDNA (Origene) was cloned into the retroviral vector pMXsIRESblasti-FLAG (Carette et al., 2011). For transduction of CHO WT and CT43 cells, the pBABE-puro-based retroviral vectors described above were used. Retroviruses packaging the transgenes were produced by

triple transfection in 293T cells, and target cells were directly exposed to sterile-filtered retrovirus-laden supernatants in the presence of polybrene (6  $\mu\text{g}/\text{mL}$ ). Transduced cell populations were selected with blasticidin (20  $\mu\text{g}/\text{mL}$ ; for pMX) or puromycin (10  $\mu\text{g}/\text{mL}$ ; for pBABE-puro).

**Expression of NPC1 proteins by transient transfection.** 293T cells were transfected with pBABE-puro constructs encoding WT or mutant NPC1 or NPC1L1 proteins using polyethyleneimine (PEI), as described previously (Dube et al., 2009). At 48 h post-transfection, cells were lysed as described below to generate extracts for GP-NPC1 binding assays.

**NPC1-containing cell extracts for GP-NPC1 binding assays.** CT43 or 293T cells expressing WT or mutant NPC1 or NPC1L1 proteins were washed with PBS, and packed cell pellets were lysed by incubation at 4°C with NTE-CHAPS buffer (pH 7.5) or MES-EDTA-CHAPS buffer (pH 5.1) (10 mM 2-(N-morpholino)ethanesulfonic acid, 140 mM NaCl, 1 mM EDTA, 0.5% vol/vol 3-[(3-cholamidopropyl)dimethylammonio]-1-propanesulfonate)) supplemented with a protease inhibitor cocktail (Roche). Typically, 1 mL buffer was used to lyse  $2 \times 10^7$  cell-equivalents. To promote cell lysis, cell suspensions were probe-sonicated (lowest setting, 5 pulses of 5 sec each) in an ice-water bath. Lysates were cleared by centrifugation at 14,000  $\times g$  for 10 min, and supernatants were used immediately.

**Affinity purification of NPC1-flag.** CT43 cells expressing NPC1-flag ( $2 \times 10^8$  cells) were harvested and lysed as above, and the extracts were incubated with magnetic beads coated with anti-flag antibody (0.25 mL) at 4°C with mixing for 12-16 h. Beads were then extensively washed with NTE-CHAPS, and bound proteins were eluted with 10 packed-bead volumes of triple flag peptide (5 mg/mL; Sigma). The eluate was concentrated and buffer-exchanged using a centrifugal concentrator (100 kDa molecular weight cutoff; Pall Biosciences), and NPC1-flag purity was assessed by SDS-PAGE and staining with the Krypton infrared protein-binding dye (Thermo).

**Recombinant VSV displaying NPC1 domain C-VSV G chimera (rVSV-domain C).** A VSV genome plasmid in which the VSV glycoprotein G open-reading frame had been replaced with an *MluI*-

*NotI* restriction cassette (pVSVΔG-eGFP-MN) (Whelan et al., 1995; Wong et al., 2010) was engineered to express NPC1 domain C-flag in the VSV G position as follows. The VSV G signal peptide sequence (encoding G amino acid residues 1-16) was fused in-frame to NPC1 domain C (encoding NPC1 amino acid residues 373-620), the VSV G transmembrane domain (last 71 residues of G), and a flag tag sequence. This chimeric domain C construct was cloned into the *MluI* and *NotI* sites of pVSVΔG-eGFP-MN. Recombinant virus was recovered and amplified as described previously (Whelan et al., 1995). A final amplification in cells lacking the complementing VSV G plasmid was performed in order to obtain virus particles only expressing the domain C-VSV G chimera. Viral incorporation of this protein was confirmed by SDS-PAGE and immunoblotting (Fig. S5a).

**Generation and purification of soluble domain C and GPΔTM proteins.** A construct engineered to encode NPC1 domain C (residues 372-622) flanked by sequences that form a stable, antiparallel coiled coil, and fused to a preprotrypsin signal sequence and flag and hexahistidine tags at its N-terminus has been described (Deffieu and Pfeffer, 2011). A plasmid encoding EBOV GPΔTM (residues 1-650) fused to a hexahistidine tag at the C-terminus was kindly provided by G.G. Olinger (USAMRIID). Soluble domain C was expressed in human 293-Freestyle cells (Invitrogen) and purified from conditioned supernatants by nickel affinity chromatography, as described previously (Deffieu and Pfeffer, 2011). GPΔTM was expressed in 293-EBNA cells (ATCC) and purified from conditioned supernatants in a similar manner.

**Neutralization of rVSV-GP-EBOV by rVSV-domain C.** Uncleaved or cleaved rVSV-GP-EBOV particles were mixed with rVSV-bald or rVSV-domain C for for 30 min at 4°C. Subsequently, the virus mixtures were deposited onto carbon-coated copper grids and stained with 2% phosphotungstic acid (PTA) in H<sub>2</sub>O (pH 7.5). Virus particles were viewed using a Tecnai G<sup>2</sup> Spirit BioTWIN transmission electron microscope (FEI, Hillsboro, OR). In parallel, virus mixtures were exposed to WT CHO monolayers in dark 96-well clear-bottom plates at an MOI of 0.01. After 7 h at 37°C, eGFP expression was quantified with a Typhoon 9400 imager (GE Healthcare).

**Neutralization of rVSV-GP-EBOV by soluble domain C.** Uncleaved or cleaved rVSV-GP-EBOV particles were mixed with soluble domain C for 1 h at room temp. Subsequently, the virus mixtures were diluted and exposed to Vero cell monolayers for 1 h at 37°C, at which time NH<sub>4</sub>Cl (20 mM) was added to block additional entry events and cell-to-cell spread. Viral infectivity was determined at 12-16 h post-infection by enumerating eGFP-positive cells.

**Authentic filoviruses and infections.** Cells were exposed to EBOV-Zaire 1995 (Jahriling et al., 1999) or MARV-Ci67 (Swenson et al., 2008) at an MOI of 3 for 1 h. Viral inoculum was then removed and fresh culture media was added. At 48 h post-infection, cells were fixed with formalin, and blocked with 1% bovine serum albumin. EBOV-infected cells and uninfected controls were incubated with EBOV GP-specific monoclonal antibodies 13F6 (Wilson et al., 2000) or KZ52 (Maruyama et al., 1999). MARV-infected cells and uninfected controls were incubated with MARV GP-specific monoclonal antibody 9G4 (Swenson et al., 2004). Cells were washed with PBS prior to incubation with either goat anti-mouse IgG or goat anti-human IgG conjugated to Alexa 488. Cells were counterstained with Hoechst stain (Invitrogen), washed with PBS and stored at 4°C. Infected cells were quantitated by fluorescence microscopy and automated image analysis. Images were acquired at 9 fields/well with a 10× objective lens on a Discovery-1 high content imager (Molecular Devices) or at 6 fields/well with a 20× objective lens on an Operetta (Perkin Elmer) high content device. Discovery-1 images were analyzed with the “live/dead” module in MetaXpress software. Operetta images were analyzed with a customized scheme built from image analysis functions present in Harmony software.

**EBOV virus-like particles (VLPs).** eGFP-labeled EBOV VLPs were generated by co-transfection of an eGFP-VP40 matrix fusion protein and EBOV GP and concentrated by ultracentrifugation, as described previously (Martin-Serrano et al., 2004). In vitro-cleaved VLPs were generated by thermolysin digestion as described for VSV-GP in Materials and Methods.

**Assay for VLP attachment to cells.** Cells in 6-well plates were exposed to uncleaved or thermolysin-cleaved VLPs (5 µL/well) in cell culture medium (1 mL/well total), and centrifuged at 2500 rpm and 4°C



Miller et al.

for 10 min. Cells were then washed, collected by gentle scraping, resuspended in PBS containing 2% FCS, and analyzed for eGFP-positive cells by flow cytometry.

**VSV M-release assay.** Cells grown on 12-mm coverslips coated with poly-D-lysine (Sigma-Aldrich) were pre-treated with cycloheximide (20 µg/mL) for 30 min to arrest cellular protein synthesis, and then inoculated with rVSV at an MOI of 200 in the presence of cycloheximide. After 3 h, cells were washed with PBS and fixed with 2% paraformaldehyde for 15 min at room temperature. To detect incoming VSV M protein, fixed cells were incubated with the monoclonal antibody 23H12 (Lefrancois and Lyles, 1982), followed by incubation with an Alexa 594-conjugated goat anti-mouse secondary antibody. Cells were counter-stained with DAPI to visualize nuclei, washed, and mounted onto glass slides. M localization images were acquired by fluorescence microscopy.

**Confocal fluorescence microscopy.** CHO cells grown on 12-mm coverslips were either directly fixed or transfected with a plasmid expressing the late endosomal/lysosomal marker LAMP1-eGFP using Lipofectamine 2000 transfection reagent (Invitrogen). Cells were processed for imaging the next day. In addition, VH-2 control cells and VH-2 cells stably expressing human NPC1-flag were inoculated with a MOI of 300 of Alexa-647-labelled rVSV-GP-EBOV (Carette et al., 2011). At the indicated time-points, cells were washed with an acid buffer to remove surface-bound virus. All cells were fixed in 4% paraformaldehyde for 15 min at room temperature. Where indicated, cells were stained with Alexa 594-conjugated wheat germ agglutinin (WGA; Invitrogen) in PBS for 5 min at room temperature to outline the plasma membrane. The quantification of viral particles (total fluorescence/cell in arbitrary units) in VH-2 cells was performed with ImageJ software (n=10 per condition).

For antibody stainings, cells were permeabilized with 0.1% Triton X-100 for 5 min at room temp, blocked overnight with PBS containing 1% BSA, and incubated with an anti-flag antibody (Sigma-Aldrich) or an anti-NPC1 antibody (Novus Biologicals). Bound primary antibodies were detected by incubation with Alexa 488- or Alexa 594-conjugated secondary antibodies (Invitrogen). Cells were mounted onto glass slides using ProLong antifade (Invitrogen) and images were acquired using a spinning disk confocal microscope (Zeiss) with a 63x objective (Cureton et al., 2010). Image analysis was performed with

Slidebook 4.2 software (Intelligent Imaging Innovations).

**Cell-surface biotinylation.** Monolayers of CT43 cells expressing NPC1 domain C-flag or domain C-flag<sup>tailless</sup> were washed with ice-cold PBS containing 0.1% glucose (PBSG) and exposed to EZ-Link NHS-PEG4-biotin in PBSG (5 mM; Thermo) for 1 h at 4 °C. Unreacted reagent was quenched by extensive washing with PBSG containing NH<sub>4</sub>Cl (50 mM), and cells were lysed with ice-cold NTE-CHAPS buffer supplemented with a protease inhibitor cocktail, as described above. Cell lysates were cleared by centrifugation at 14,000 ×g for 10 min. In parallel, CHAPS extracts of unlabeled cells were biotinylated as above to generate a ‘total lysate labeling’ control. Flag-tagged proteins in the cell extracts were retrieved by immunoprecipitation with flag antibody-coated beads as described in Materials and Methods (‘GP-NPC1 co-immunoprecipitation assays’ section). Captured proteins were subjected to SDS-PAGE and immunoblotting with streptavidin-horseradish peroxidase and anti-flag antibody to detect biotinylated and flag-tagged proteins, respectively.

| \_\_\_\_\_

### Supplementary References

- Carette, J.E., Raaben, M., Wong, A.C., Herbert, A.S., Obernosterer, G., Mulherkar, N., Kuehne, A.I., Kranzusch, P.J., Griffin, A.M., Ruthel, G., *et al.* Ebola virus entry requires the cholesterol transporter Niemann-Pick C1. *Nature*, doi:10.1038/nature10348.
- Cureton, D.K., Massol, R.H., Whelan, S.P., and Kirchhausen, T. (2010). The length of vesicular stomatitis virus particles dictates a need for actin assembly during clathrin-dependent endocytosis. *PLoS Pathog* **6**, e1001127.
- Deffieu, M. and Pfeffer, S.R. (2011). Niemann-Pick type C1 function requires luminal domain residues that mediate cholesterol-dependent NPC2 binding. *Proc Natl Acad Sci USA* **108**, 18932-18936.
- Dube, D., Brecher, M.B., Delos, S.E., Rose, S.C., Park, E.W., Schornberg, K.L., Kuhn, J.H., and White, J.M. (2009). The primed ebolavirus glycoprotein (19-kilodalton GP1,2): sequence and residues critical for host cell binding. *J Virol* **83**, 2883-2891.
- Jahrling, P.B., Geisbert, T.W., Geisbert, J.B., Swearengen, J.R., Bray, M., Jaax, N.K., Huggins, J.W., LeDuc, J.W., and Peters, C.J. (1999). Evaluation of immune globulin and recombinant interferon-alpha2b for treatment of experimental Ebola virus infections. *J Infect Dis* **179 Suppl 1**, S224-234.
- Kwon, H.J., Abi-Mosleh, L., Wang, M.L., Deisenhofer, J., Goldstein, J.L., Brown, M.S., and Infante, R.E. (2009). Structure of N-terminal domain of NPC1 reveals distinct subdomains for binding and transfer of cholesterol. *Cell* **137**, 1213-1224.
- Lee, J.E., Fusco, M.L., Hessel, A.J., Oswald, W.B., Burton, D.R., and Saphire, E.O. (2008). Structure of the Ebola virus glycoprotein bound to an antibody from a human survivor. *Nature* **454**, 177-182.
- Lefrancois, L. and Lyles D.S. (1982). [The interaction of antibody with the major surface glycoprotein of vesicular stomatitis virus. I. Analysis of neutralizing epitopes with monoclonal antibodies.](#) *Virology* **121**, 157-167.
- Martin-Serrano, J., Perez-Caballero, D., and Bieniasz, P.D. (2004). Context-dependent effects of L domains and ubiquitination on viral budding. *J. Virol.* **78**, 5554-5563.
- Maruyama, T., Rodriguez, L.L., Jahrling, P.B., Sanchez, A., Khan, A.S., Nichol, S.T., Peters, C.J., Parren, P.W., and Burton, D.R. (1999). Ebola virus can be effectively neutralized by antibody produced in natural human infection. *J Virol* **73**, 6024-6030.
- Morgenstern, J.P., and Land, H. (1990). Advanced mammalian gene transfer: high titre retroviral vectors with multiple drug selection markers and a complementary helper-free packaging cell line. *Nucleic Acids Res* **18**, 3587-3596.

- Swenson, D.L., Warfield, K.L., Larsen, T., Alves, D.A., Coberley, S.S., and Bavari, S. (2008). Monovalent virus-like particle vaccine protects guinea pigs and nonhuman primates against infection with multiple Marburg viruses. *Expert Rev Vaccines* **7**, 417-429.
- Weissenhorn, W., Carfi, A., Lee, K.H., Skehel, J.J., and Wiley, D.C. (1998). Crystal structure of the Ebola virus membrane fusion subunit, GP2, from the envelope glycoprotein ectodomain. *Mol. Cell* **2**, 605-616.
- Whelan, S.P., Ball, L.A., Barr, J.N., and Wertz, G.T. (1995). Efficient recovery of infectious vesicular stomatitis virus entirely from cDNA clones. *Proc Natl Acad Sci USA* **92**, 8388-8392.
- Wilson, J.A., Hevey, M., Bakken, R., Guest, S., Bray, M., Schmaljohn, A.L., and Hart, M.K. (2000). Epitopes involved in antibody-mediated protection from Ebola virus. *Science* **287**, 1664-1666.
- Wong, A.C., Sandesara, R.G., Mulherkar, N., Whelan, S.P., and Chandran, K. (2010). A forward genetic strategy reveals destabilizing mutations in the Ebolavirus glycoprotein that alter its protease dependence during cell entry. *J Virol* **84**, 163-175.

## Supplementary Figure Legends

**Fig. S1.** Hypothesized structural rearrangements in the Ebola virus glycoprotein during viral entry, and a topological model of the Niemann-Pick C1 protein. (a) Surface-shaded views of EBOV GP in its pre-fusion (PDB id: 3CSY (Lee et al., 2008)) and putative post-fusion conformations (PDB id: 1EBO (Weissenhorn et al., 1998)) are shown. C-terminal GP2 sequences were not visualized in 1EBO and are modeled. EBOV GP is a trimer of GP1-GP2 heterodimers. GP1 consists of four structural subdomains, the base, the head, which contains the putative receptor-binding site (rbs), the glycan cap, and the mucin domain (modeled). GP is cleaved by endosomal cysteine proteases during entry to generate GP<sub>CL</sub>, which lacks the glycan cap and mucin subdomains and contains an exposed rbs. GP<sub>CL</sub> rearranges in response to an unknown fusion trigger, resulting in GP1-GP2 dissociation, insertion of the GP2 fusion loops into the target membrane, and finally, the formation of the 'six-helix bundle' GP2 configuration. These conformational changes drive viral membrane fusion. The disposition of GP1 in GP<sub>post-fusion</sub> is unknown. (b) Topological model of NPC1 based on Davies and Ioannou (2000). Domain A contains a sterol-binding domain, but the specific functions of domains C and I are unknown (Kwon et al., 2009). In the present studies, a flag epitope tag was appended to the C-terminus of NPC1.

**Fig. S2.** The NPC1-dependent filovirus entry block in VH-2 viper heart cells is at a late entry step and is not caused by a deficiency in endo/lysosomal cholesterol transport. (a) Control and human NPC1 (hNPC1)-expressing VH-2 cells were exposed to Alexa 647-labeled rVSV-GP-EBOV-eGFP. At 8 h post-infection, the cells were fixed after an acid wash to remove cell surface-bound virus. Cells were stained with Alexa 594-conjugated wheat germ agglutinin (WGA) to outline the plasma membrane and WGA (red), internalized viral particles (blue), and virus-expressed eGFP (green) were visualized by confocal fluorescence microscopy. (b) Viral particles internalized into cells from panel a were quantitated with ImageJ software (total fluorescence/cell in arbitrary units; n=10 cells per condition). Greater numbers of perinuclear viral puncta were observed in the control VH-2 cells than in the human NPC1-expressing cells, suggesting that viral particles undergo attachment, internalization, and delivery to late endosomal compartments, but cannot escape from these compartments in the absence of human NPC1. (c) VH-2 cells

were transfected with human NPC1-flag and infected with Alexa 647-labeled rVSV-GP-EBOV-eGFP at 48 h after transfection as described above. At 8 h post-infection, cells were fixed and stained with an anti-flag antibody. Colocalization of NPC1-flag and internalized viral particles was visualized by confocal fluorescence microscopy. The inset represents a 12× digital zoom of the boxed area in the main image. Viral particles were readily observed inside NPC1-flag-positive vesicles (arrows). (d) Control and human NPC1-expressing VH-2 cells were left untreated or exposed to the NPC1 pathway inhibitor U18666A (20 μM) for 24 h. Cells were then stained with the fluorescent cholesterol-binding dye, filipin. Intracellular cholesterol accumulation was visualized by fluorescence microscopy. [Scale bar, 10 μm.](#) Profound cholesterol storage was observed only upon U18666A treatment, indicating that these cells possess a functional pathway for egress of cholesterol from endo/lysosomal compartments.

**Fig. S3.** Cellular localization of NPC1 'loop-minus' mutants lacking luminal domains A, C, or I. Late endosomal/lysosomal localization of NPC1 proteins stably expressed in CHO CT43 cells was assessed by confocal fluorescence microscopy. Cells were transfected to express a LAMP1-eGFP fusion protein, fixed, and then immunostained for NPC1 with an anti-flag antibody. The bottom right image in each quadrant represents a 15× digital zoom of the boxed area in each overlay image. All of the mutant NPC1 proteins showed substantial colocalization with LAMP1-eGFP (white arrowheads).

**Fig. S4.** Expression and cellular localization of synthetic membrane proteins containing individual NPC1 luminal domains A, C, or I. (a) CT43 CHO cells stably expressing domain A-flag, domain C-flag, domain I-flag, or domain C-flag<sup>tailless</sup> were lysed and subjected to SDS-PAGE, and expression of each protein was assessed by immunoblotting (IB) with an anti-flag antibody. Cellular cyclin-dependent kinase 4 (CDK4) was used as a loading control. M<sub>r</sub>, relative molecular weight. [Samples for detection of each type of protein were resolved on the same gel.](#) (b) Late endosomal/lysosomal localization of domain A-flag, domain C-flag, domain I-flag, and domain C-flag<sup>tailless</sup> was assessed by confocal fluorescence microscopy as described in Fig. S3. The bottom right image in each quadrant represents a 15× digital zoom of the boxed area in each overlay image. Domain A-flag and domain C-flag showed substantial colocalization with LAMP1-eGFP (white arrowheads), but domain I-flag did not, and its filamentous distribution was consistent with

its retention in the ER.

**Fig. S5.** Recombinant VSV displaying a NPC1 domain C-VSV G chimera clusters virus containing cleaved but not uncleaved filovirus glycoproteins. (a) rVSV-domain C particles incorporate NPC1 domain C. Cell supernatants containing rVSV-G, rVSV-bald (lacking a virus-encoded surface glycoprotein), and rVSV-domain C were concentrated by ultracentrifugation and subjected to immunoblotting with anti-flag antibody. [Samples were resolved on the same gel.](#) (b) Capacity of rVSV-domain C to bind to rVSV-GP. rVSV-GP and rVSV-GP<sub>CL</sub> were preincubated with rVSV-domain C or rVSV-bald. Virus mixtures were stained with phosphotungstic acid and visualized by transmission electron microscopy. Arrows indicate large clusters of viral particles. This is a larger version of the image in Fig. 5b, and is shown for clarity.

**Fig. S6.** Purified forms of soluble GP and NPC1 domain C. Purified preparations of EBOV GP lacking the transmembrane domain (GP $\Delta$ TM) and soluble domain C were resolved on SDS-polyacrylamide gels and visualized with the Krypton protein stain (Thermo). [Samples were resolved on the same gel.](#)

**Fig. S7.** Expression of NPC1 in WT CHO cells. CHO cells stably expressing a control vector or human NPC1-flag were lysed and subjected to SDS-PAGE. Expression of endogenous NPC1 and ectopic NPC1-flag was assessed by immunoblotting (IB) with anti-NPC1 and anti-flag antibodies, respectively. [Samples for detection of each epitope were resolved on the same gel.](#)

**Fig. S8.** A GP mutant defective at NPC1 binding can mediate viral attachment to cells that is not enhanced by NPC1 overexpression. WT CHO cells expressing endogenous levels of NPC1 or overexpressing NPC1-flag (see Fig. S7) were exposed to EBOV virus-like particles bearing GP(WT) or GP(3Ala) at 4 °C for 30 min and binding was assessed by flow cytometry. Flow histograms were gated for eGFP positivity (mean fluorescence intensity >10), and this analysis gate was used to quantitate % eGFP-positive cells in Fig. 7e.

**Fig. S9.** A GP2 fusion-loop mutant virus binds to NPC1. (a) Uncleaved and cleaved VSV-GP(F535R) were

incubated with cell extracts containing NPC1-flag, and GP(F535R) was retrieved by immunoprecipitation (IP) with monoclonal antibody KZ52. NPC1-flag in immune pellets and supernatants was detected by immunoblotting (IB) with an anti-flag antibody. [Pellets and supernatants were resolved on separate gels \(one gel for each\) but exposed simultaneously to the same piece of film.](#) (b) GP pre-fusion structure [PDB id: 3CSY (Lee et al., 2008)] with GP1 (blue) and GP2 (green) in surface-shaded and cartoon representations, respectively. GP2 fusion loop residue F535 (purple) is shown as balls-and-sticks. GP1 residues critical for NPC1-binding (K114+K115+K140) and that contact each GP2 fusion loop are highlighted in red and yellow, respectively. Residue F88, which falls into both categories, is shown in orange.

**Fig. S10.** Retargeting of a synthetic NPC1 domain C-based receptor to the plasma membrane. (a) Plasma membrane localization of WT NPC1-flag, domain C-flag, and domain C-flag<sup>tailless</sup> in CT43 cells was assessed by confocal fluorescence microscopy. Cells were exposed to Alexa 594-conjugated wheat germ agglutinin (WGA) to outline the plasma membrane, and then fixed and immunostained for NPC1 with an anti-flag antibody. The bottom right image in each quadrant represents a 15× digital zoom of the boxed area in each overlay image. Only domain C-flag<sup>tailless</sup> localizes extensively to the plasma membrane (white arrows). (b) Detection of domain C at the plasma membrane by cell-surface biotinylation. Intact CT43 cells expressing domain C-flag and domain C-flag<sup>tailless</sup> or extracts derived from these cells were exposed to an amine-specific biotinylation probe, NHS4-PEG-biotin, at 4 °C. Cells were then lysed, and flag-tagged proteins were recovered by immunoprecipitation (IP) with an anti-flag antibody. Immune pellets were subjected to SDS-PAGE and immunoblotting with streptavidin and an anti-flag antibody to detect biotinylated and flag-tagged proteins, respectively. [Samples for detection of each epitope were resolved on the same gel \(one gel each for streptavidin and flag\).](#) Only domain C-flag<sup>tailless</sup> was labeled by the cell-surface biotinylation reagent.



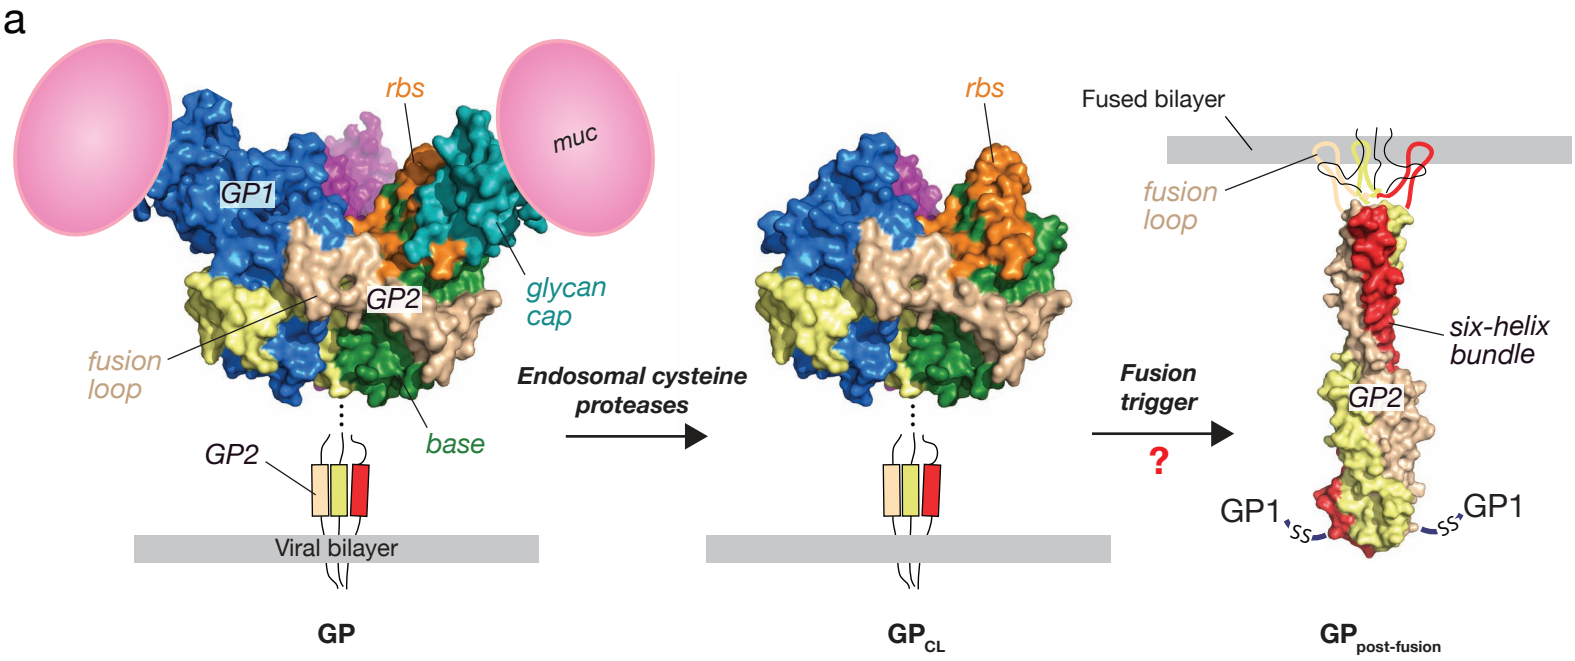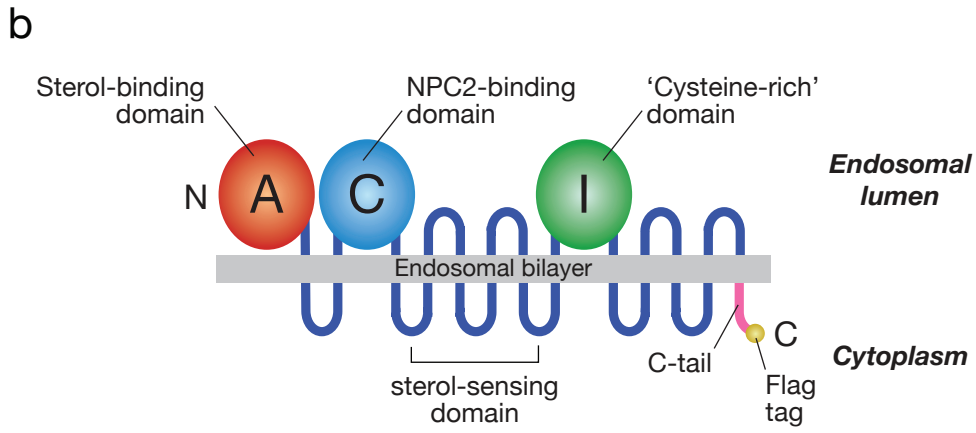

a

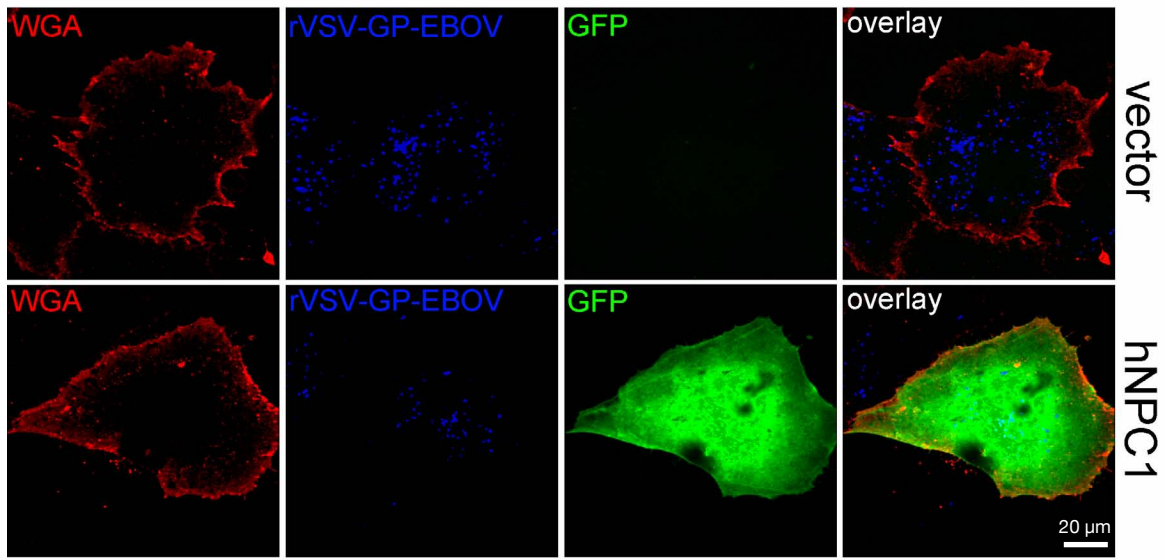

b

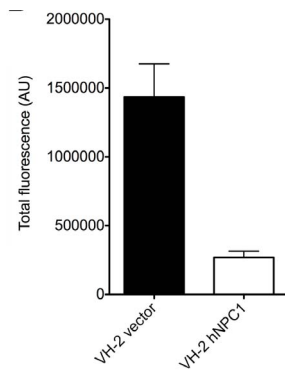

c

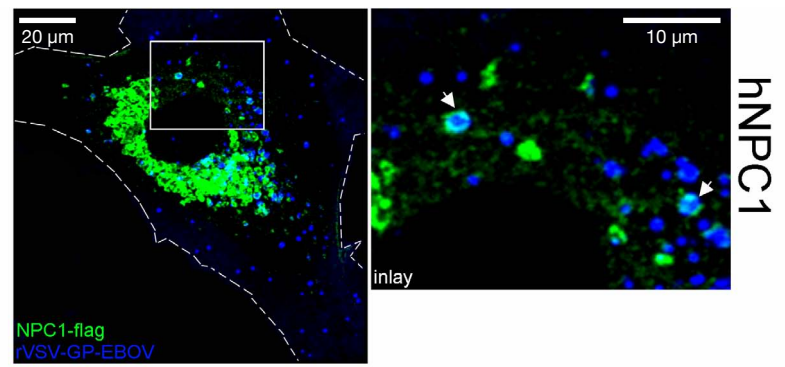

d

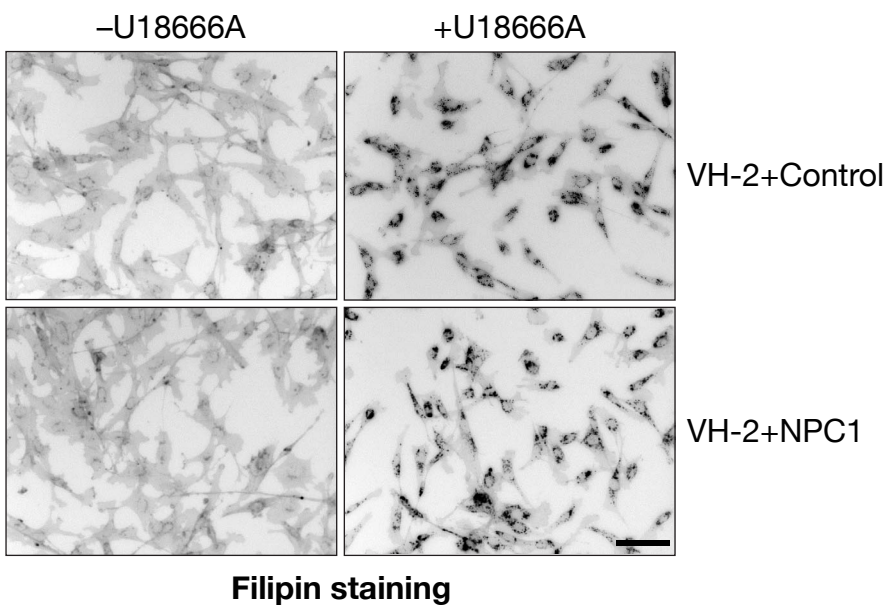

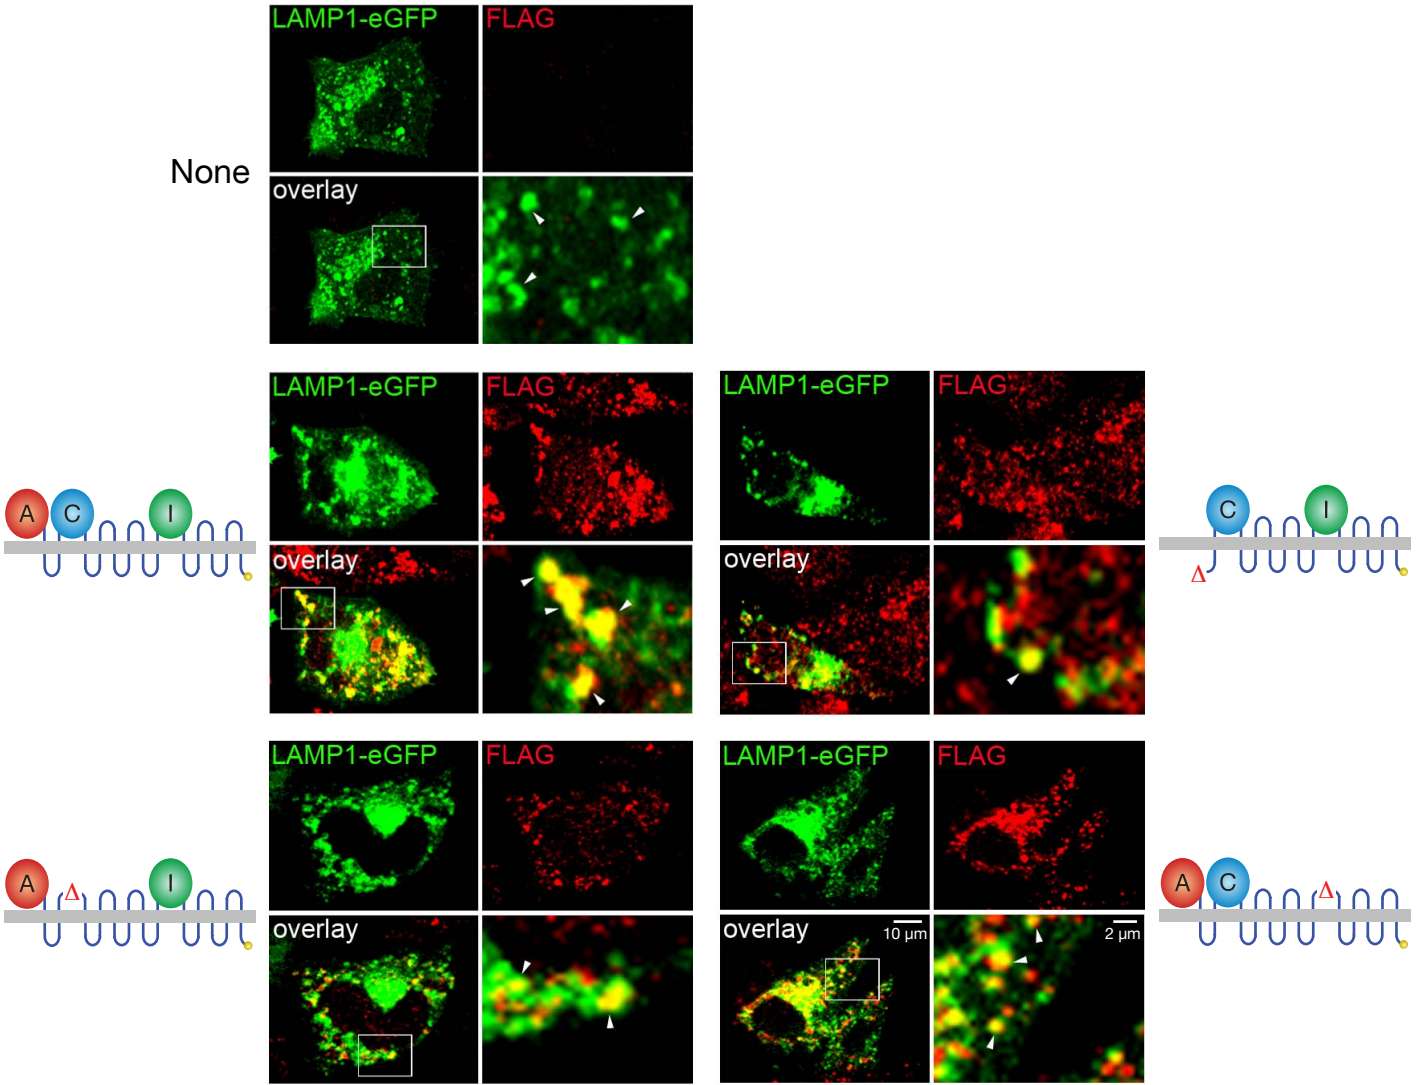

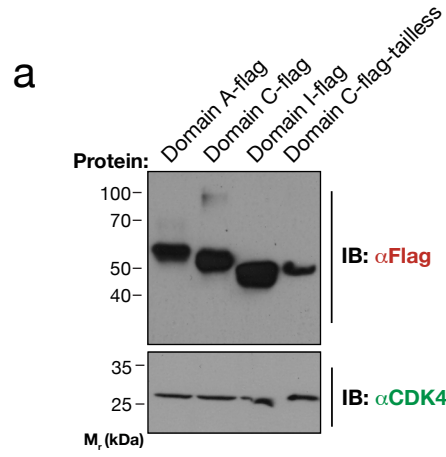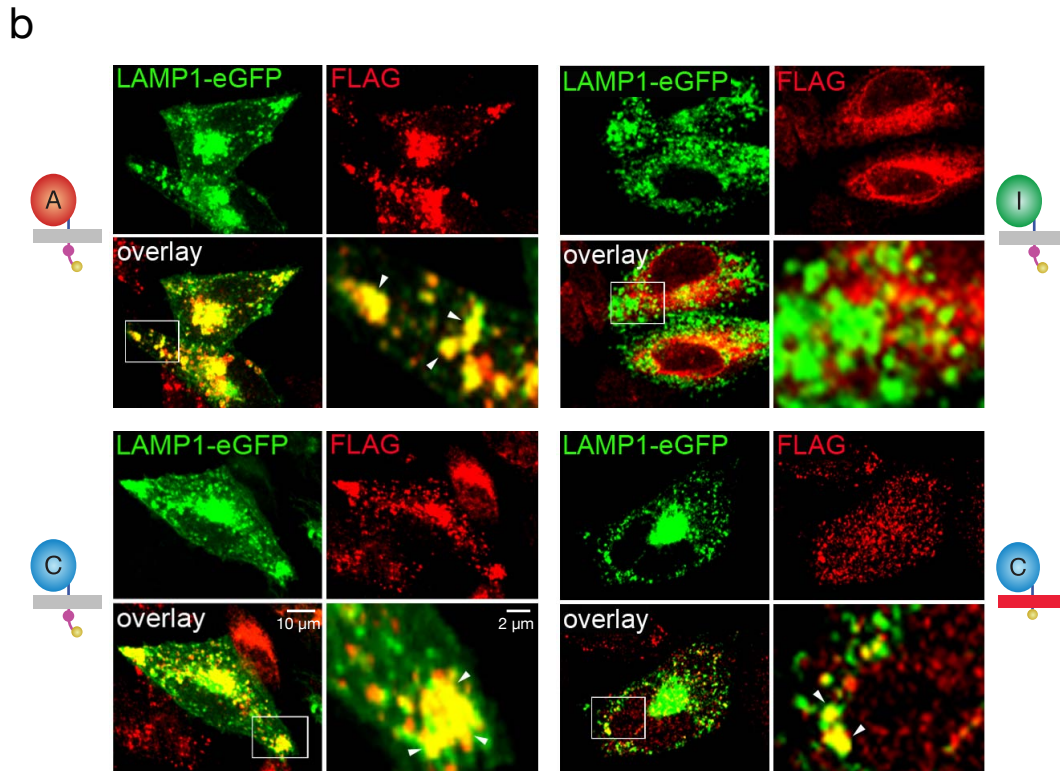



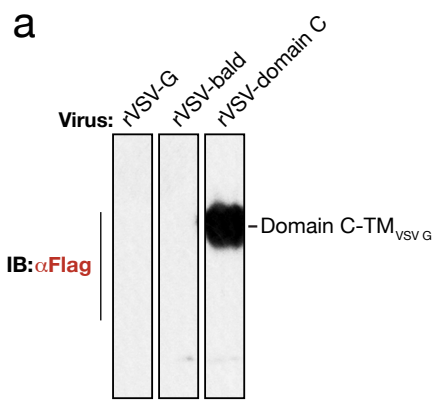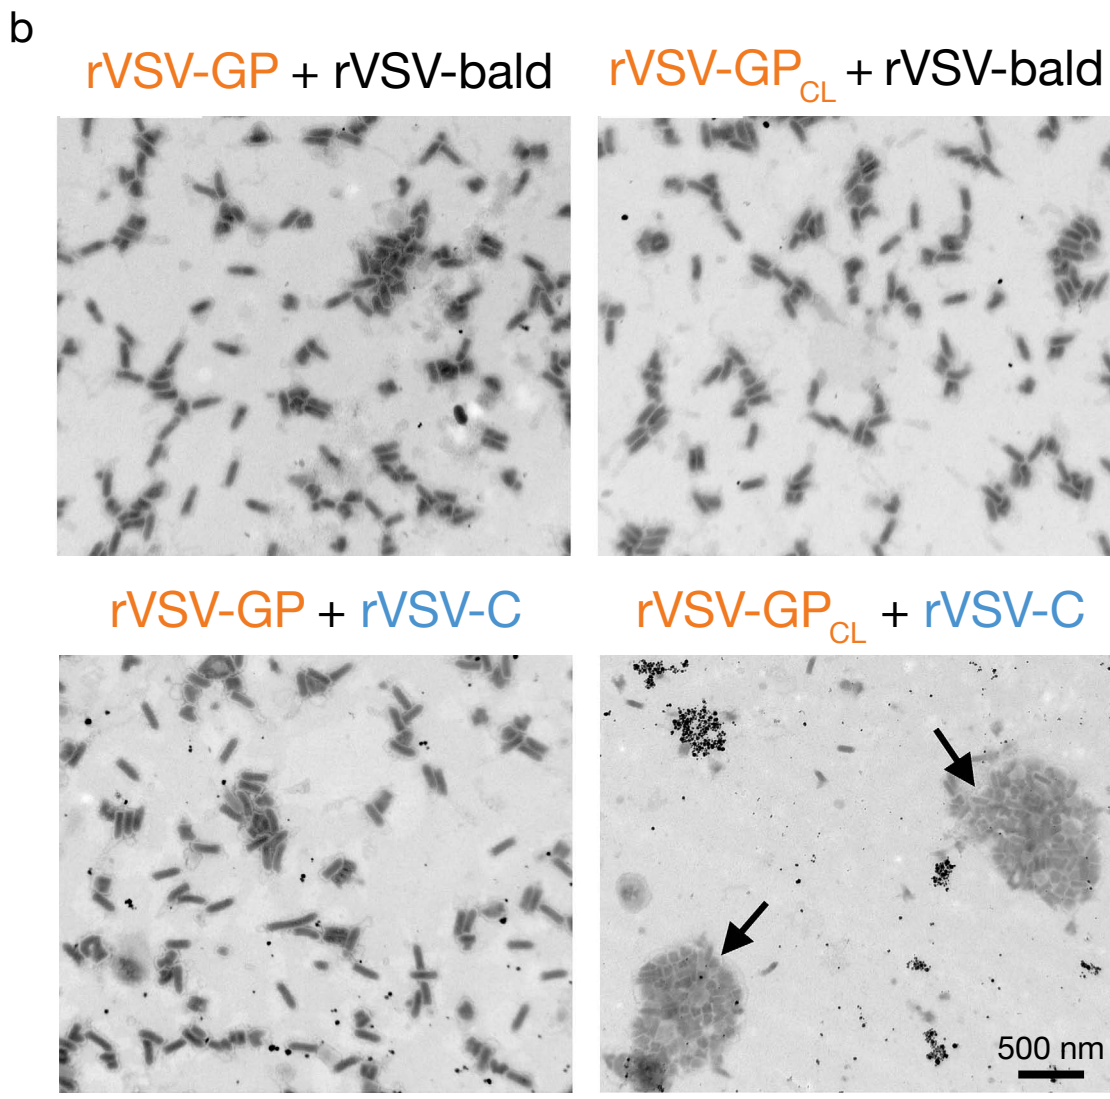

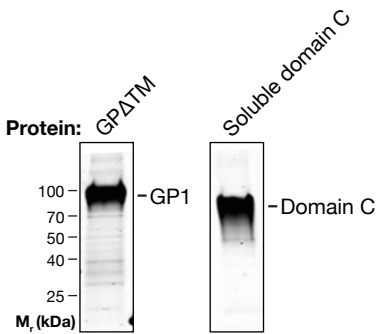

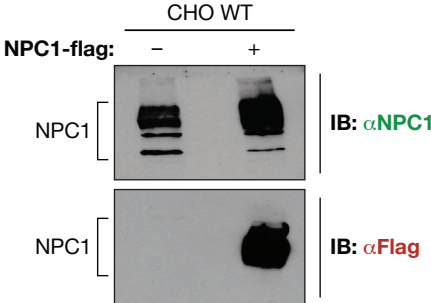

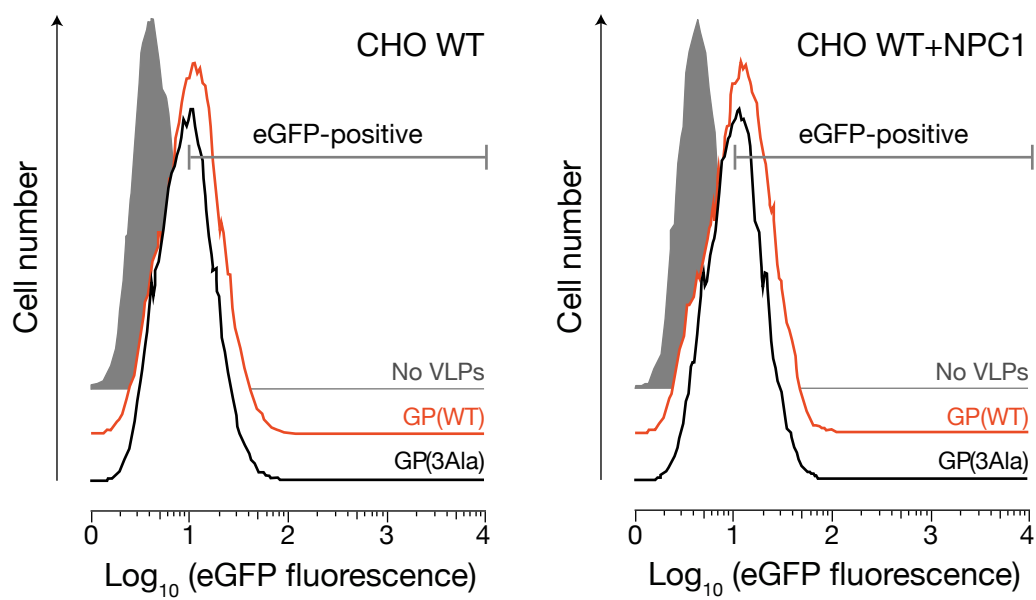



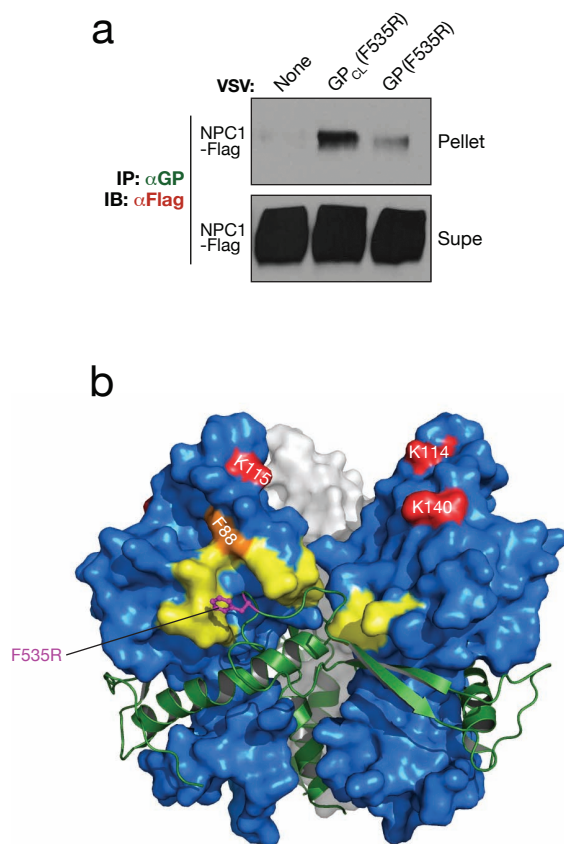

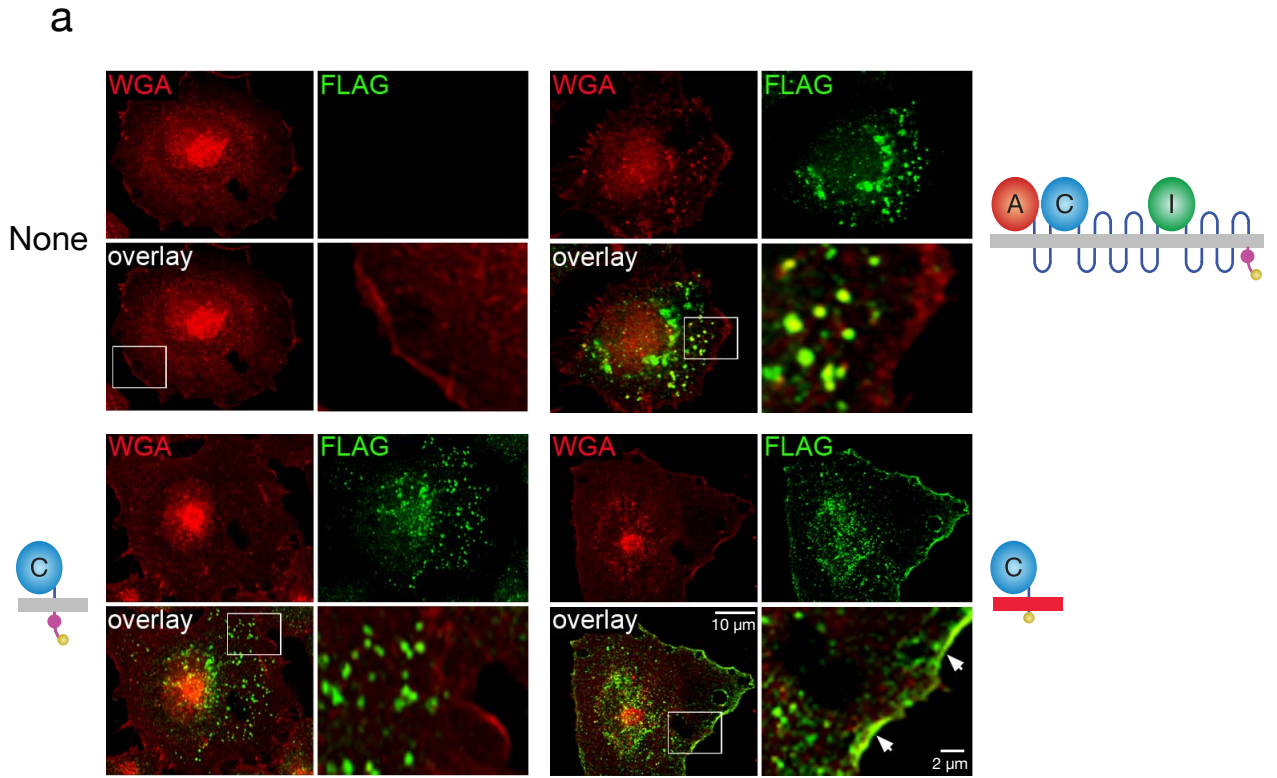

**b**

|                       |   |   |   |   |   |   |
|-----------------------|---|---|---|---|---|---|
| NHS-PEG4-biotin       | - | + | + | - | + | + |
| Surface labeling      | - | + | - | - | + | - |
| Total lysate labeling | - | - | + | - | - | + |

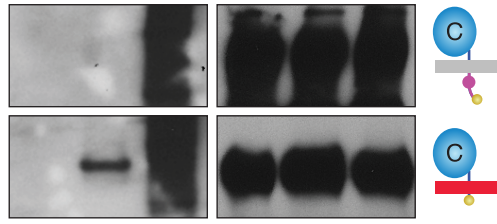

Supplement: emboj201253s1.pdf [file emboj201253s1.pdf]
