# Supplementary material
Source: PubMed Central journal article supplement (PMC3343336)

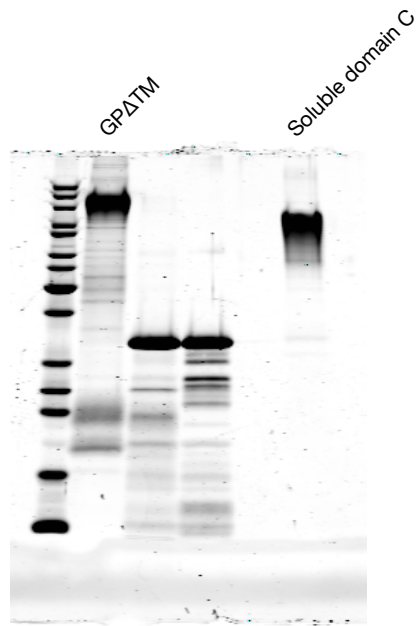

Supplement: emboj201253s10.pdf [file emboj201253s10.pdf]

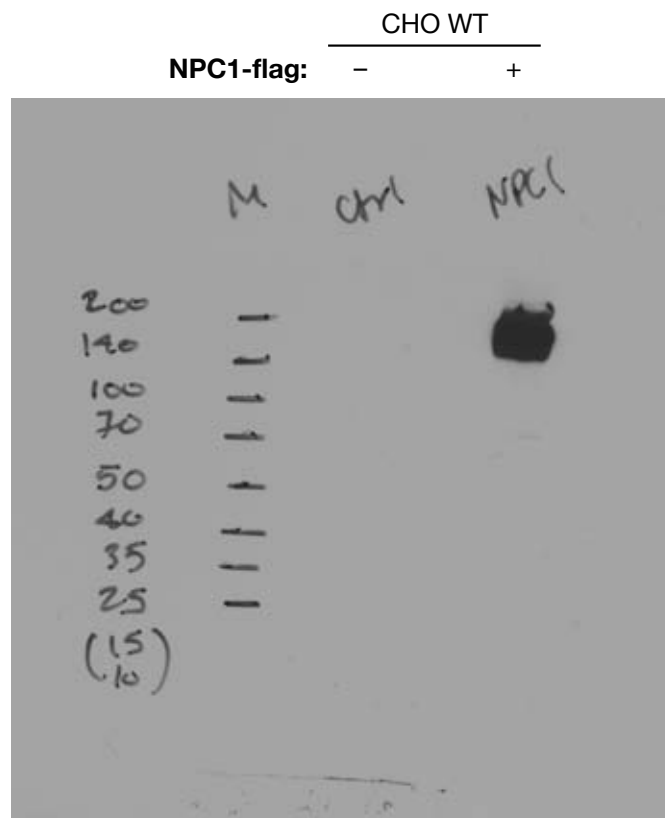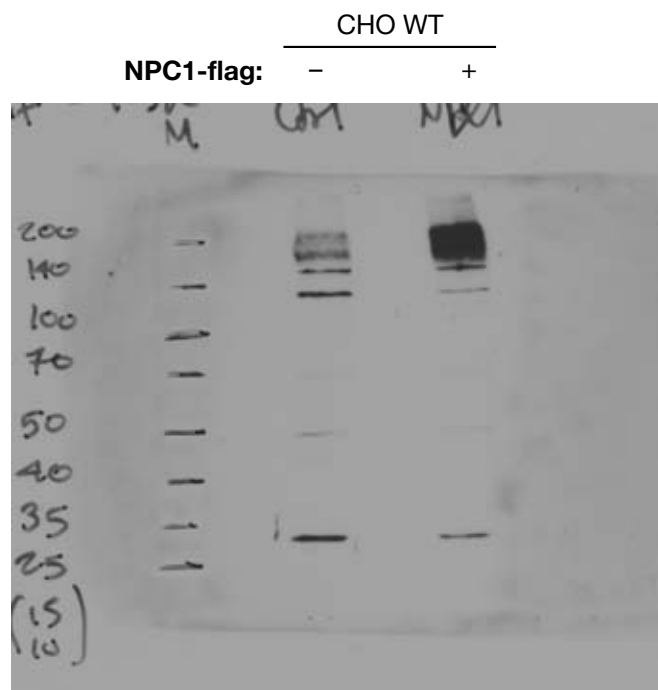

Supplement: emboj201253s11.pdf [file emboj201253s11.pdf]

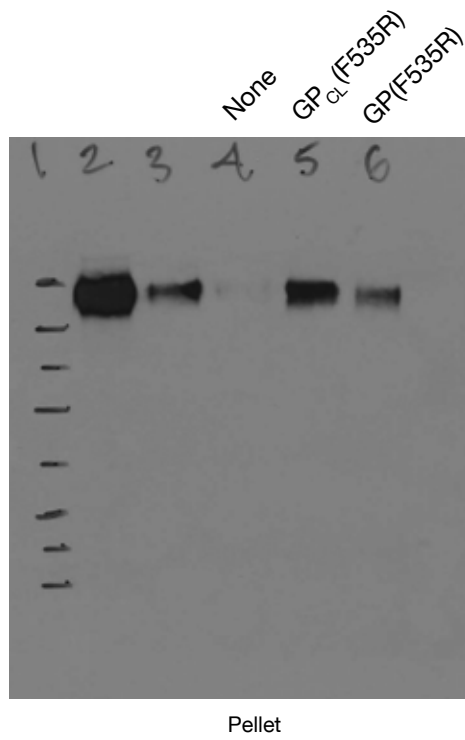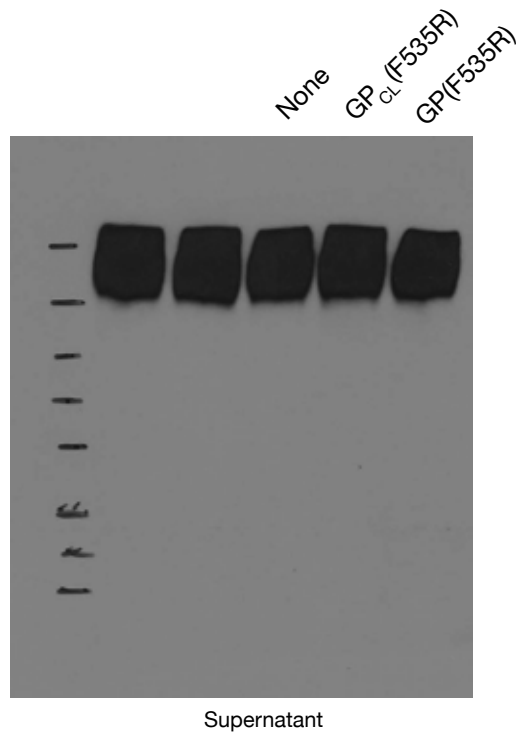

Supplement: emboj201253s12.pdf [file emboj201253s12.pdf]

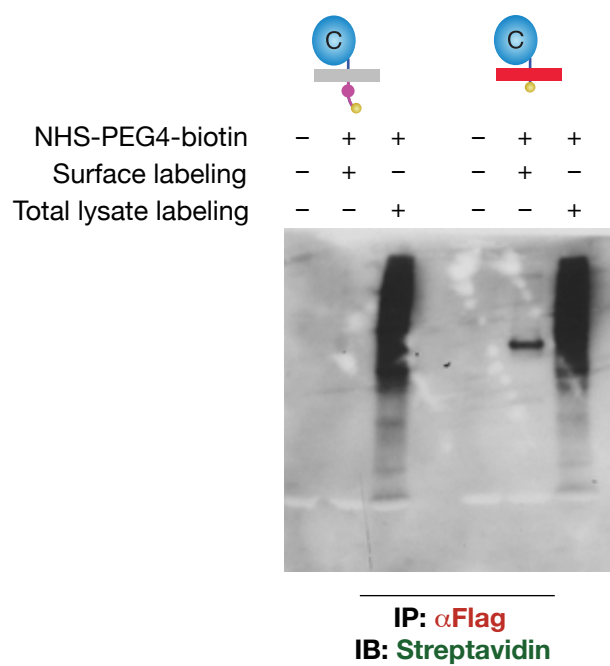

Supplement: emboj201253s13.pdf [file emboj201253s13.pdf]

Human      VH-2  
NPC1:      -    +

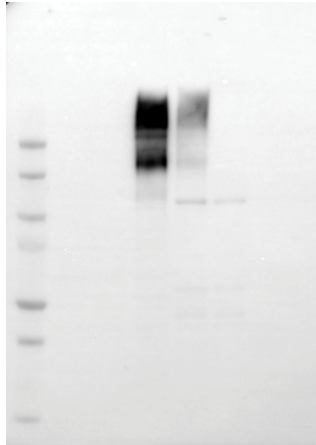

Human      VH-2  
NPC1:      -    +

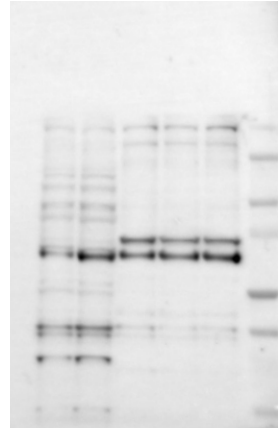

Loading  
control

Supplement: emboj201253s2.pdf [file emboj201253s2.pdf]

a

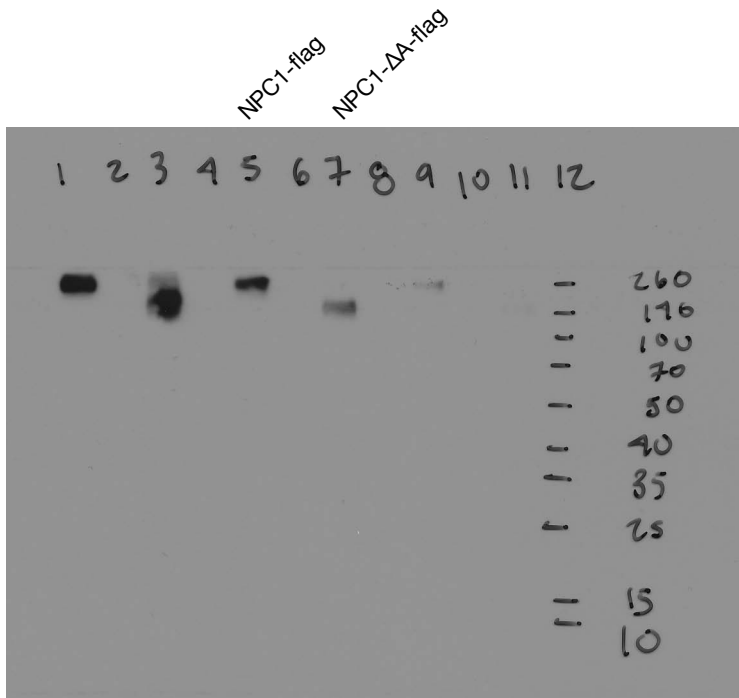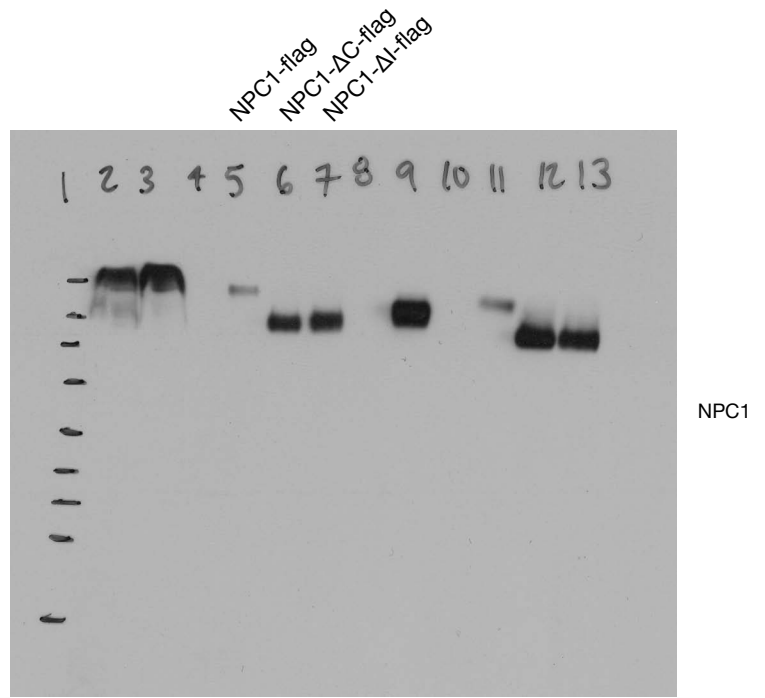

a

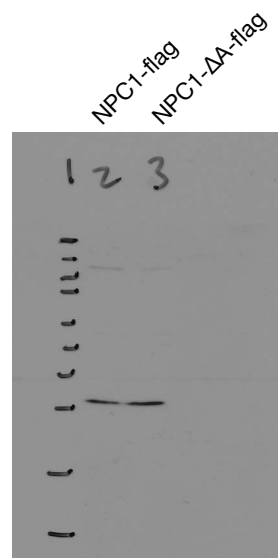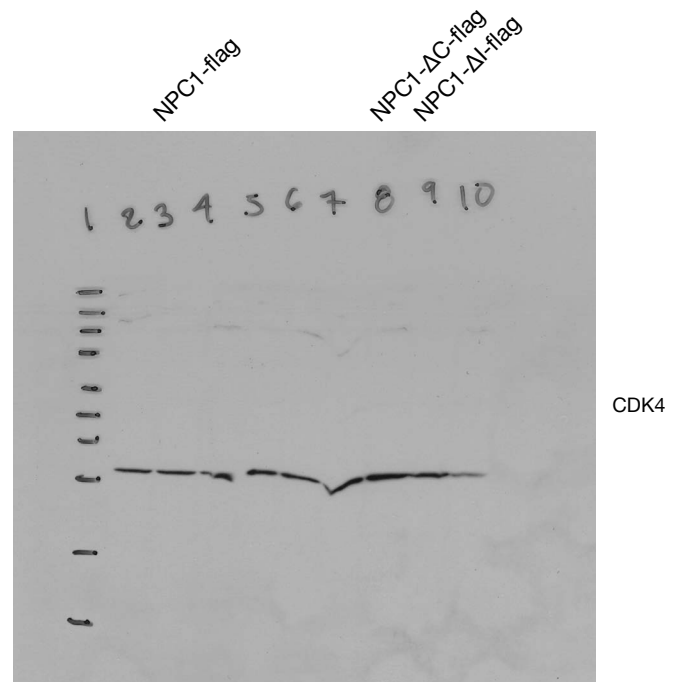

Supplement: emboj201253s3.pdf [file emboj201253s3.pdf]

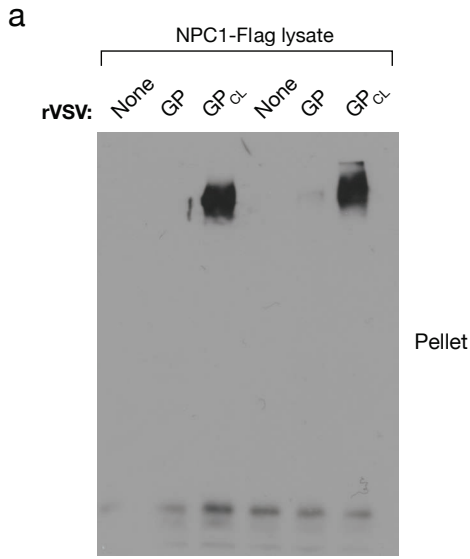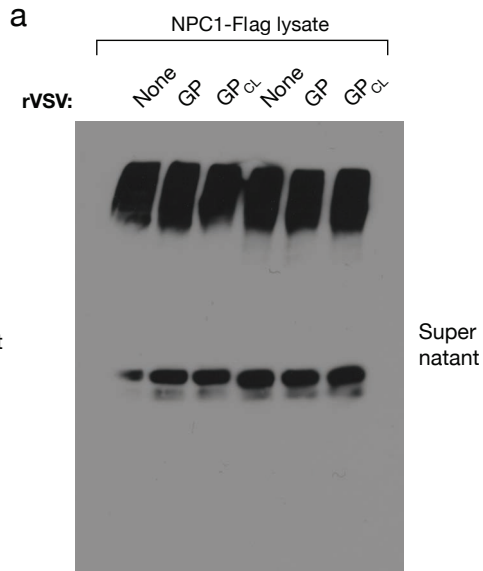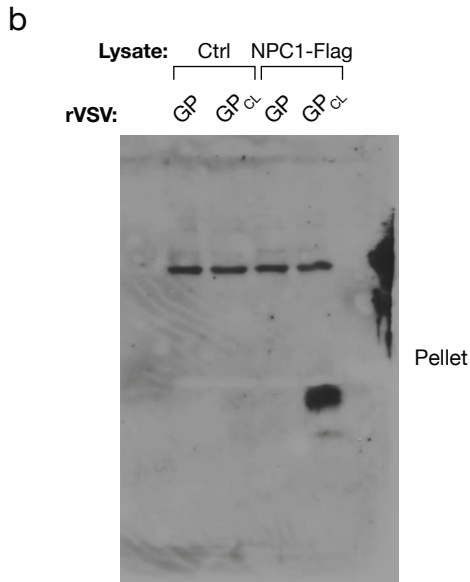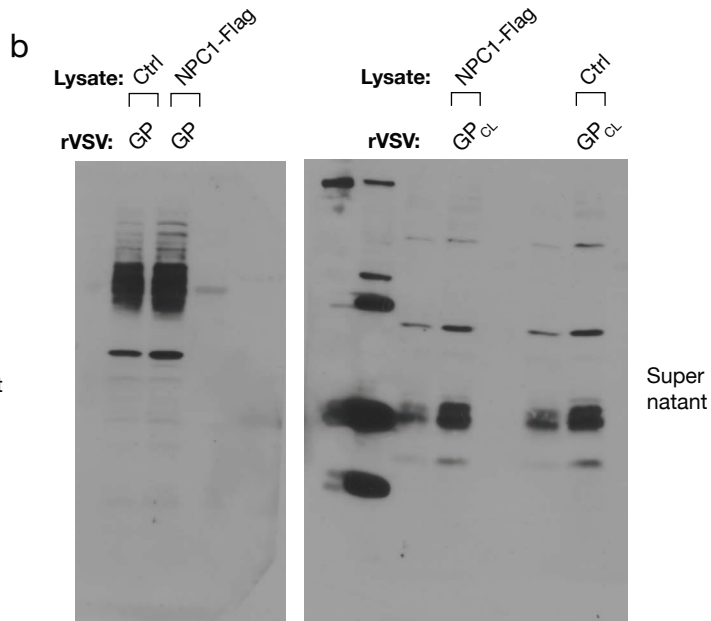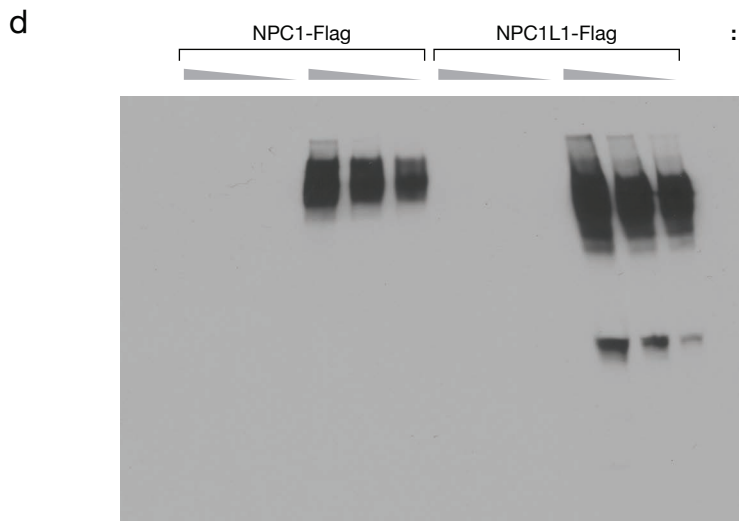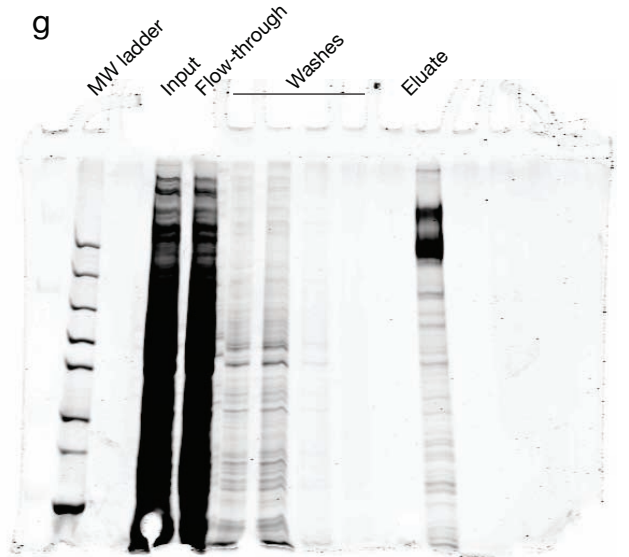

Supplement: emboj201253s4.pdf [file emboj201253s4.pdf]

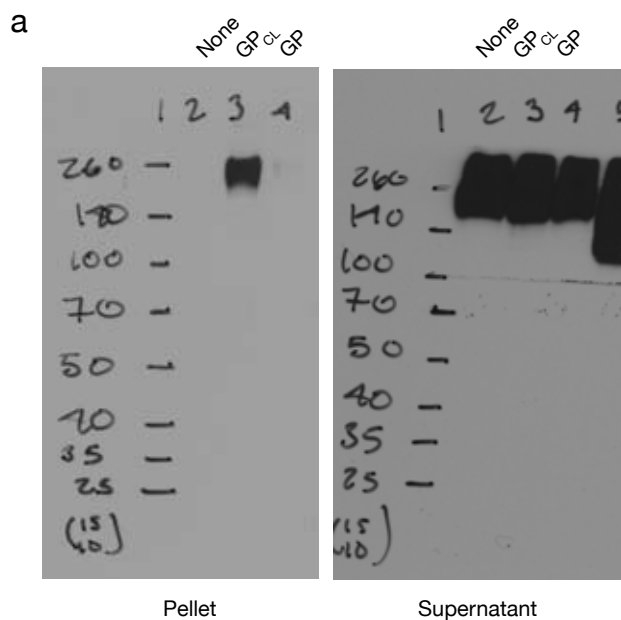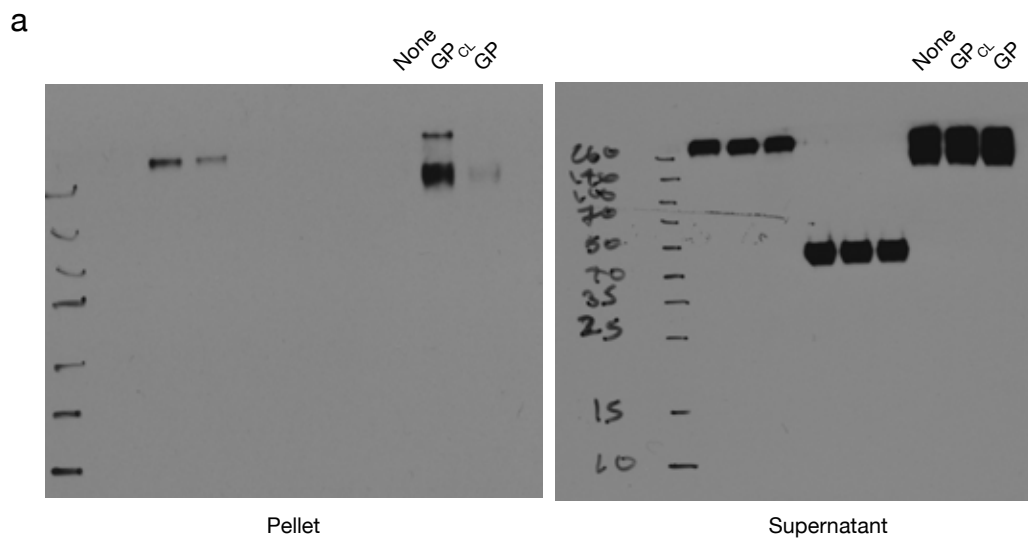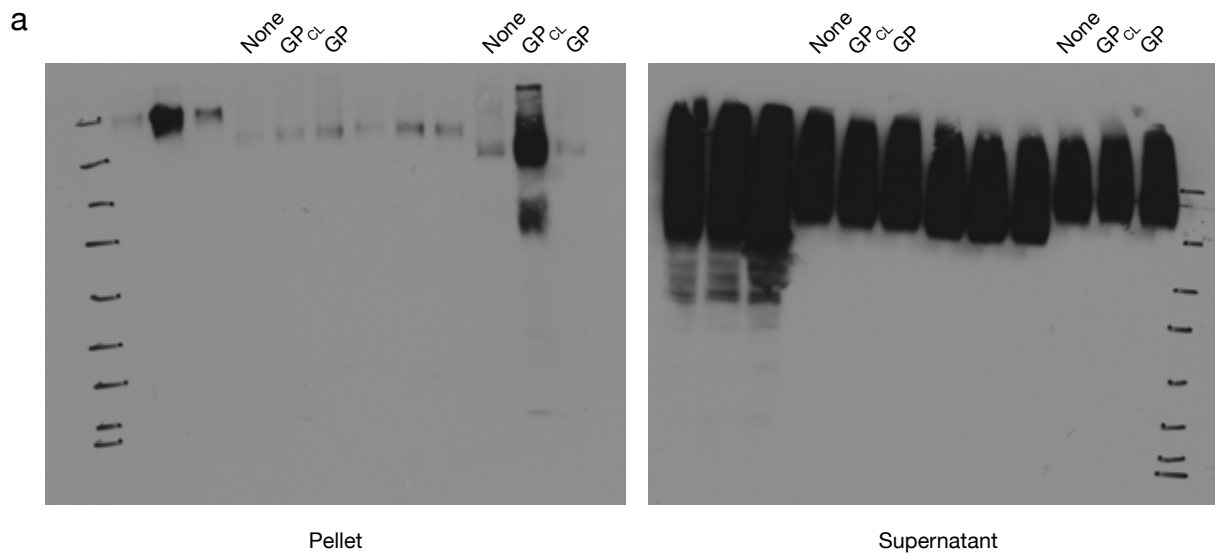

C

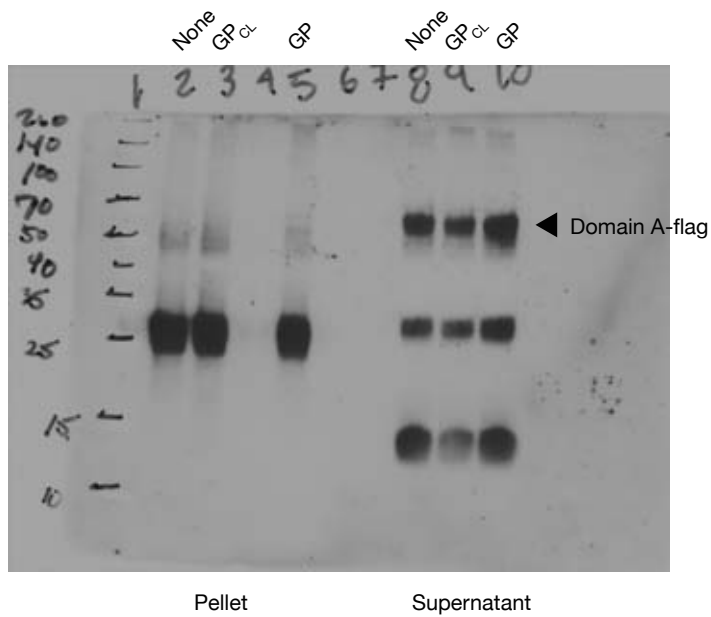

C

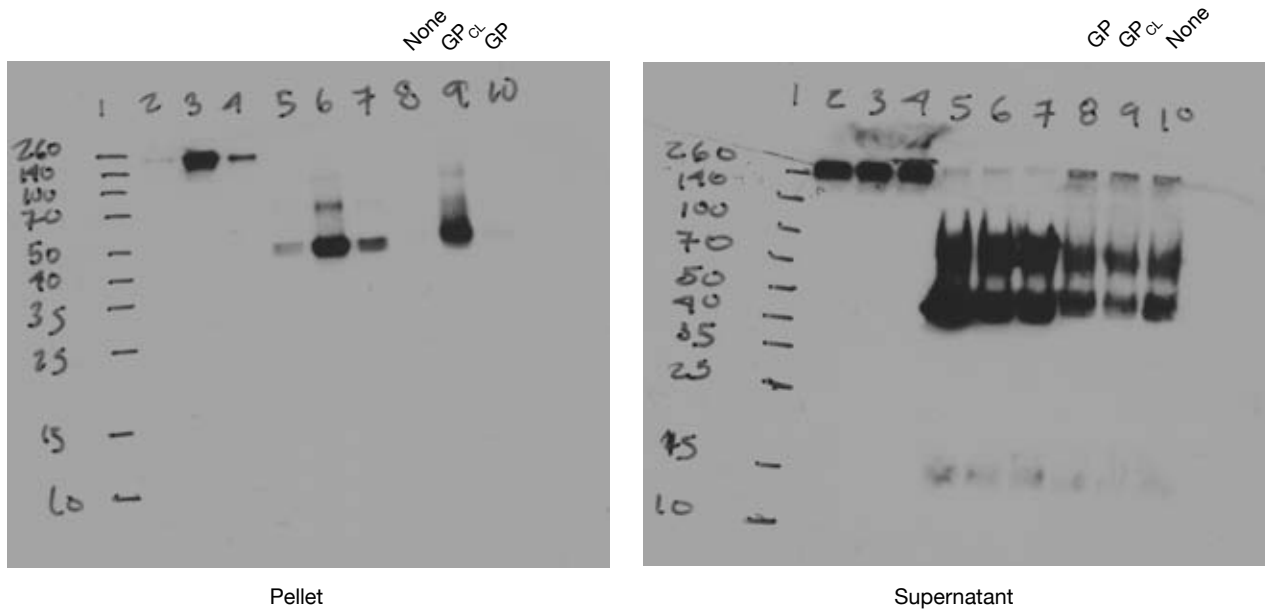

C

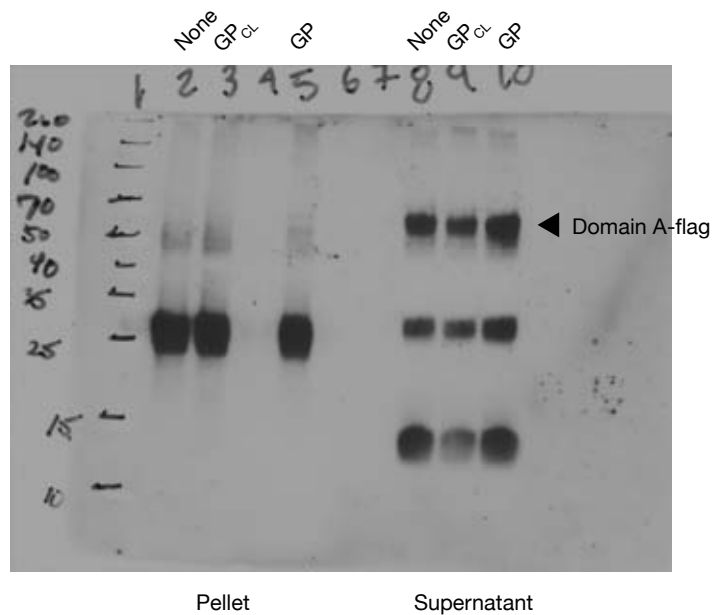

C

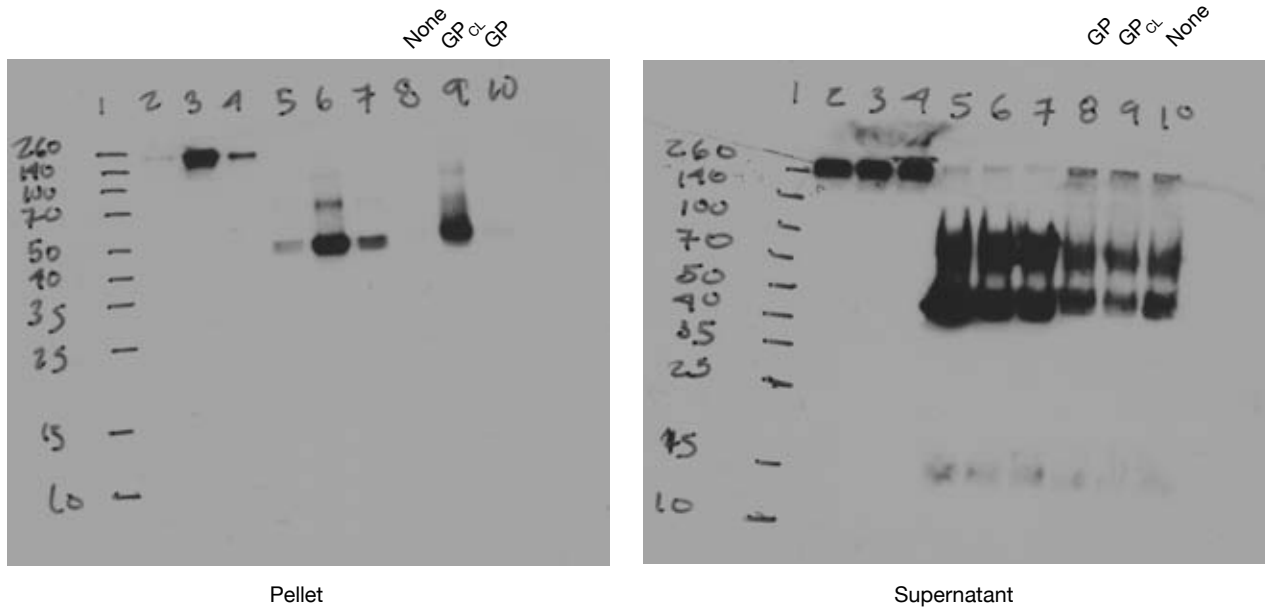

Supplement: emboj201253s5.pdf [file emboj201253s5.pdf]

e

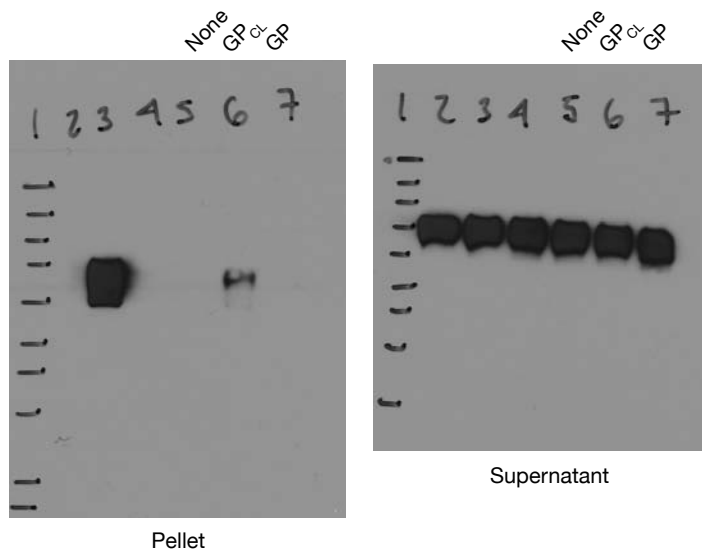

Supplement: emboj201253s6.pdf [file emboj201253s6.pdf]

a

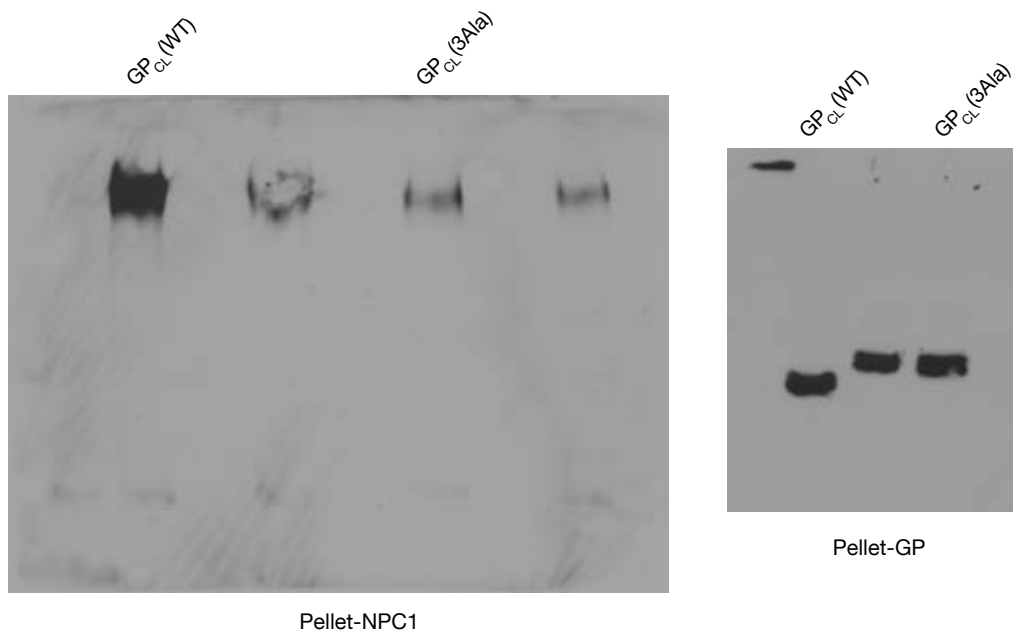

b

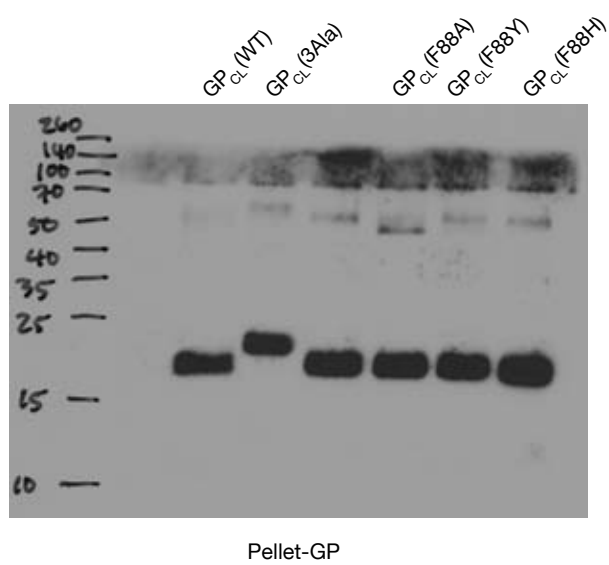

Supplement: emboj201253s7.pdf [file emboj201253s7.pdf]

a  
Domain A-flag  
Domain C-flag  
Domain I-flag  
Domain C-flag-tailless

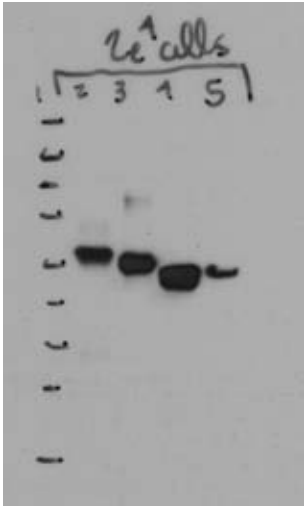

Supplement: emboj201253s8.pdf [file emboj201253s8.pdf]

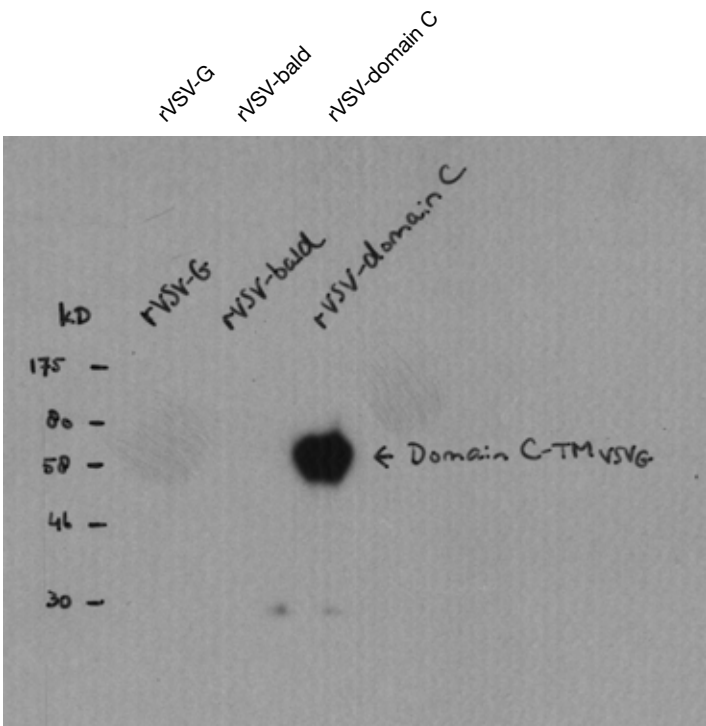

Supplement: emboj201253s9.pdf [file emboj201253s9.pdf]
